# Supplementary material for: Path and site effects deduced from merged transfrontier internet macroseismic data of two recent M 4 earthquakes in northwest Europe using a grid cell approach
Source: Copernicus journal article supplement (doi:10.5194/se-8-453-2017), 2017-04-07
Supplement: Supplementary file 2 [file se-8-453-2017-supplement.zip]

**COMPARISON OF MACROSEISMIC QUESTIONNAIRES USED IN VAN NOTEN ET AL. (2017), Solid Earth, 8, 453-477.**

| Nr.                                                    | Questions                                                           | Possible answers                                                                                                                         | ROB-BNS | BCSF                         | KNMI | NRW-GD | BGS            | EMSC | USGS |
|--------------------------------------------------------|---------------------------------------------------------------------|------------------------------------------------------------------------------------------------------------------------------------------|---------|------------------------------|------|--------|----------------|------|------|
| 1                                                      | Date and Time                                                       |                                                                                                                                          | yes     | yes                          | yes  | yes    | yes            | yes  | yes  |
| 2                                                      | Street, Address                                                     |                                                                                                                                          | yes     | yes                          | yes  | yes    | yes            | yes  | yes  |
| 3                                                      | Zip code, City, Country                                             |                                                                                                                                          | yes     | yes                          | yes  | yes    | yes            | yes  | yes  |
| <b>PERSON'S SITUATION WHEN THE EARTHQUAKE OCCURRED</b> |                                                                     |                                                                                                                                          |         |                              |      |        |                |      |      |
| 4                                                      | How many times have you felt an earthquake ?                        | 1st, few times, often                                                                                                                    | no      | no                           | no   | no     | no             | yes  | no   |
| 5                                                      | What was your situation during the earthquake?                      | No answer / Inside / Outside / In a stopped vehicle / In a moving vehicle / other                                                        | yes     | yes (less precise)           | yes  | yes    | yes            | yes  | yes  |
| 6                                                      | What was your situation during the earthquake?                      | church tower / electricity mast / scaffolding                                                                                            | no      | no                           | no   | yes    | no             | no   | no   |
| 7                                                      | If you were inside, please select the type of building or structure | No building, Family home, Apartment building, Office building/school, Mobile Home with permanent foundation / Trailer without foundation | yes     | yes                          | yes  | partly | yes            | no   | no   |
| 8                                                      | At what floor where you?                                            | Inside / Outside / Groundfloor / Floor number                                                                                            | yes     | <2, 2/3, 3/4, >=5            | yes  | yes*   | 0,1,2,3,4-8,>8 | yes  | no   |
| 9                                                      | Type (wood, brick, etc.) of the building                            | wood / brick / concrete / loam / ...                                                                                                     | yes     | yes                          | yes  | yes    | Yes            | no   | no   |
| 10                                                     | Height (in floors) of the building                                  | specify                                                                                                                                  | yes     | yes                          | yes  | no     | no             | no   | no   |
| 11                                                     | Type of activity during event                                       | Standing, sitting, lying, walking, kneeling, sleeping                                                                                    | no      | yes                          | no   | yes    | yes            | yes  | no   |
| 12                                                     | Swinging effect of the respondent                                   | Standing up, swaying, fell                                                                                                               | no      | yes                          | no   | yes    | no             | yes  | no   |
| <b>PERCEPTION OF THE EARTHQUAKE</b>                    |                                                                     |                                                                                                                                          |         |                              |      |        |                |      |      |
| 13                                                     | Did you feel the earthquake?                                        | no / yes                                                                                                                                 | yes     | yes                          | yes  | no**   | yes            | yes  | yes  |
| 14                                                     | Were you asleep during the earthquake?                              | no / yes, didn't get up / yes, did get up                                                                                                | yes     | yes                          | yes  | yes    | yes            | yes  | yes  |
| 15                                                     | What best describes any sound you heard?                            | no sound / rumblinb / roaring / explosion                                                                                                | no      | yes                          | no   | yes    | yes            | yes  | no   |
| 16                                                     | Did you hear a noise? How loud ?                                    | no / yes, slight, loud noise                                                                                                             | yes     | yes                          | no   | yes*   | yes            | yes  | yes  |
| 17                                                     | Did you hear church bells ?                                         | no / yes                                                                                                                                 | no      | no                           | no   | yes    | no             | yes  | no   |
| 18                                                     | Did other persons nearby feel the earthquake?                       | I don't know, nobody nearby/some felt it, others not/most felt it, others not/(almost) everyone felt it                                  | yes     | no                           | yes  | yes    | yes            | yes  | yes  |
| 19                                                     | Have you felt shocks before or after, if so how long/many           | Specify                                                                                                                                  | no      | YES (last case observations) | no   | yes    | no             | no   | no   |
| <b>YOUR EXPERIENCE OF THE EARTHQUAKE</b>               |                                                                     |                                                                                                                                          |         |                              |      |        |                |      |      |
| 20                                                     | How would you best describe the ground shaking?                     | weak / mild / moderate / strong / violent                                                                                                | yes     | yes                          | yes  | yes*   | yes            | yes  | yes  |
| 21                                                     | How would you describe the earthquake shaking                       | vibrating / trembling / swaying / impact / rolling                                                                                       | no      | yes                          | no   | yes    | yes            | yes  | no   |
| 22                                                     | About how many seconds did the shaking last?                        | Specify                                                                                                                                  | yes     | no                           | yes  | yes    | no             | no   | no   |
| 23                                                     | How would you best describe your reaction?                          | no reaction / very little reaction / excitement / (somewhat, very, extreme) frightened                                                   | yes     | yes                          | yes  | yes*   | yes            | yes  | yes  |
| 24                                                     | How did you respond?                                                | No action / moved / cover / ran outside                                                                                                  | yes     | yes                          | yes  | yes*   | yes            | no   | yes  |
| 25                                                     | Was it difficult to stand or walk?                                  | no / yes (difficult, fallen, forcibly thrown)                                                                                            | yes     | yes                          | yes  | yes*   | no             | no   | yes  |

| Nr.                                                 | Questions                                                                                                                                                                                                                                                                                                                                                                                                                                                                                                                                                                                                                                                                                                                                                                                   | Possible answers                                                                                                 | ROB-BNS | BCSF                             | KNMI | NRW-GD                  | BGS                                    | EMSC          | USGS |
|-----------------------------------------------------|---------------------------------------------------------------------------------------------------------------------------------------------------------------------------------------------------------------------------------------------------------------------------------------------------------------------------------------------------------------------------------------------------------------------------------------------------------------------------------------------------------------------------------------------------------------------------------------------------------------------------------------------------------------------------------------------------------------------------------------------------------------------------------------------|------------------------------------------------------------------------------------------------------------------|---------|----------------------------------|------|-------------------------|----------------------------------------|---------------|------|
| <b>EARTHQUAKE EFFECTS ON FURNATURE AND BUILDING</b> |                                                                                                                                                                                                                                                                                                                                                                                                                                                                                                                                                                                                                                                                                                                                                                                             |                                                                                                                  |         |                                  |      |                         |                                        |               |      |
| 26                                                  | Did you notice the swinging or swaying of doors, windows or free-hanging objects?                                                                                                                                                                                                                                                                                                                                                                                                                                                                                                                                                                                                                                                                                                           | No answer, did not look / yes (slight/violent swinging)                                                          | yes     | yes (only objects)               | yes  | yes, only checkbox      | yes                                    | yes           | yes  |
| 27                                                  | Did you notice creaking or other noises?                                                                                                                                                                                                                                                                                                                                                                                                                                                                                                                                                                                                                                                                                                                                                    | No answer, paid no attention / yes (slight/loud noise)                                                           | yes     | yes                              | yes  | yes, only checkbox      | no                                     | no            | yes  |
| 28                                                  | Did objects rattle, topple over, or fall off shelves?                                                                                                                                                                                                                                                                                                                                                                                                                                                                                                                                                                                                                                                                                                                                       | No answer, no shelves / Yes: slight/ loud rattle - few toppled - few/many/everything fell off                    | yes     | yes                              | yes  | Yes, only checkbox      | yes                                    | yes           | yes  |
| 29                                                  | Did pictures on walls move or get knocked askew?                                                                                                                                                                                                                                                                                                                                                                                                                                                                                                                                                                                                                                                                                                                                            | No answer, no furniture / no / yes                                                                               | yes     | yes                              | yes  | yes                     | yes                                    | yes           | yes  |
| 30                                                  | Did any furniture or appliances slide, tip over, or become displaced?                                                                                                                                                                                                                                                                                                                                                                                                                                                                                                                                                                                                                                                                                                                       | No answer, no heavy appliance / no / yes, some contents fell, shifted few cm, shifted a foot (30 cm), overturned | yes     | yes                              | yes  | yes, only checkbox      | yes                                    | yes           | yes  |
| 31                                                  | Was a heavy appliance (refrigerator or range) affected?                                                                                                                                                                                                                                                                                                                                                                                                                                                                                                                                                                                                                                                                                                                                     | No answer, no furniture / no / yes                                                                               | yes     | yes                              | yes  | no                      | yes                                    | no            | yes  |
| 32                                                  | Moving liquids, oscillation / overflow of liquids in bowls?                                                                                                                                                                                                                                                                                                                                                                                                                                                                                                                                                                                                                                                                                                                                 | no / yes / don't know                                                                                            | no      | yes                              | no   | yes                     | yes                                    | yes           | no   |
| 33                                                  | Did trees / bushes swing ?                                                                                                                                                                                                                                                                                                                                                                                                                                                                                                                                                                                                                                                                                                                                                                  | no / yes / don't know                                                                                            | no      | no                               | no   | yes                     | yes                                    | yes           | no   |
| 34                                                  | Were free-standing walls or fences damaged?                                                                                                                                                                                                                                                                                                                                                                                                                                                                                                                                                                                                                                                                                                                                                 | No answer, no walls / no / yes, some were cracked/partially fell/completely fell                                 | yes     | no                               | yes  | no                      | no                                     | no            | yes  |
| 35                                                  | If you were inside, was there any damage to the building? Check all that apply:<br><br><i>No damage</i><br><br><i>Hairline cracks in walls</i><br><br><i>A few large cracks in walls</i><br><br><i>Many large cracks in walls</i><br><br><i>Ceiling tiles or lighting fixtures fell</i><br><br><i>Cracks in chimney</i><br><br><i>One or several cracked windows</i><br><br><i>Many windows cracked or some broken out</i><br><br><i>Masonry fell from block or brick wall(s)</i><br><br><i>Old chimney, major damage or fell down</i><br><br><i>Modern chimney, major damage or fell down</i><br><br><i>Outside wall(s) tilted over or collapsed completely</i><br><br><i>Separation of porch, balcony, or other addition from building</i><br><br><i>Building shifted over foundation</i> |                                                                                                                  | yes     | no                               | yes  | no                      | yes                                    | yes           | yes  |
|                                                     |                                                                                                                                                                                                                                                                                                                                                                                                                                                                                                                                                                                                                                                                                                                                                                                             |                                                                                                                  | yes     | yes (+ quantity)                 | yes  | Yes, only checkbox      | yes                                    | not specified | yes  |
|                                                     |                                                                                                                                                                                                                                                                                                                                                                                                                                                                                                                                                                                                                                                                                                                                                                                             |                                                                                                                  | yes     | yes                              | yes  |                         | yes                                    |               | yes  |
|                                                     |                                                                                                                                                                                                                                                                                                                                                                                                                                                                                                                                                                                                                                                                                                                                                                                             |                                                                                                                  | yes     | yes                              | yes  |                         | yes                                    |               | yes  |
|                                                     |                                                                                                                                                                                                                                                                                                                                                                                                                                                                                                                                                                                                                                                                                                                                                                                             |                                                                                                                  | yes     | yes                              | yes  |                         | no                                     |               | yes  |
|                                                     |                                                                                                                                                                                                                                                                                                                                                                                                                                                                                                                                                                                                                                                                                                                                                                                             |                                                                                                                  | yes     | yes                              | yes  | yes                     | yes                                    |               | yes  |
|                                                     |                                                                                                                                                                                                                                                                                                                                                                                                                                                                                                                                                                                                                                                                                                                                                                                             |                                                                                                                  | yes     | no                               | yes  | yes                     | yes                                    |               | yes  |
|                                                     |                                                                                                                                                                                                                                                                                                                                                                                                                                                                                                                                                                                                                                                                                                                                                                                             |                                                                                                                  | yes     | yes                              | yes  | yes                     | yes                                    |               | yes  |
|                                                     |                                                                                                                                                                                                                                                                                                                                                                                                                                                                                                                                                                                                                                                                                                                                                                                             |                                                                                                                  | yes     | yes (+ quantity)                 | yes  | no                      | yes                                    |               | yes  |
|                                                     |                                                                                                                                                                                                                                                                                                                                                                                                                                                                                                                                                                                                                                                                                                                                                                                             |                                                                                                                  | yes     | yes, but without age distinction | yes  | Yes, no age distinction | Yes, no age distinction                |               | yes  |
|                                                     |                                                                                                                                                                                                                                                                                                                                                                                                                                                                                                                                                                                                                                                                                                                                                                                             |                                                                                                                  | yes     | yes (+ quantity)                 | yes  | no                      | no                                     |               | yes  |
|                                                     |                                                                                                                                                                                                                                                                                                                                                                                                                                                                                                                                                                                                                                                                                                                                                                                             |                                                                                                                  | yes     | no                               | yes  | no                      | no                                     |               | yes  |
|                                                     |                                                                                                                                                                                                                                                                                                                                                                                                                                                                                                                                                                                                                                                                                                                                                                                             |                                                                                                                  | yes     | no                               | yes  | no                      | no                                     |               | Yes  |
| 36                                                  | Did the roof collapse?                                                                                                                                                                                                                                                                                                                                                                                                                                                                                                                                                                                                                                                                                                                                                                      | Total / part (quantity)                                                                                          | no      | yes                              | no   | yes                     | House partly or completely collapsed ? | no            | no   |
|                                                     | Did any poles or storeys collapse?                                                                                                                                                                                                                                                                                                                                                                                                                                                                                                                                                                                                                                                                                                                                                          | yes / no                                                                                                         | no      | yes                              | no   | no                      |                                        | no            | no   |
|                                                     | Cracks at joints, poles, wall corners?                                                                                                                                                                                                                                                                                                                                                                                                                                                                                                                                                                                                                                                                                                                                                      | specify                                                                                                          | no      | yes                              | no   | no                      |                                        | no            | no   |
|                                                     | Did parts of walls or the facade collapse?                                                                                                                                                                                                                                                                                                                                                                                                                                                                                                                                                                                                                                                                                                                                                  | yes / no                                                                                                         | no      | yes                              | no   | no                      |                                        | no            | no   |

| Nr.                                     | Questions                                     | Possible answers                                     | ROB-BNS | BCSF | KNMI | NRW-GD | BGS | EMSC | USGS |
|-----------------------------------------|-----------------------------------------------|------------------------------------------------------|---------|------|------|--------|-----|------|------|
| <b>ENVIRONMENTAL EARTHQUAKE EFFECTS</b> |                                               |                                                      |         |      |      |        |     |      |      |
| 37                                      | Environmental effects                         | Ground cracking / landslided /waving ground movement | no      | no   | no   | yes    | yes | yes  | no   |
| 38                                      | Unusual animal behaviour                      | No/Yes, pets, farms animals, no animals nearby       | no      | no   | no   | yes    | yes | yes  | no   |
| <b>Are THUMBNAILS provided?</b>         |                                               |                                                      | no      | yes  | no   | no     | no  | yes  | no   |
| <b>Type of intensity maps?</b>          | Intensity map based on individual coordinates |                                                      | no*     | no*  | n/a  | yes*   | no* | yes* | no*  |
|                                         | Zip code map                                  |                                                      | yes     | yes  | yes  | no     | yes | yes  | yes  |
|                                         | Geocoded "boxes" maps                         |                                                      | yes     | no   | no   | no     | no  | no   | yes  |
|                                         | Nearest city maps                             |                                                      | no      | no   | no   | no     | no  | yes  | yes  |

UPDATE (2017-04-12):

yes\*

*Cells with asterisk are updated after additional input by NRW-GD after final publication of our paper in Solid Earth (2017-04-07).*

UPDATE (2017-04-12):

no\*\*

*NRW-GD encourages people to fill in the questionnaire if the earthquake was not felt. The specific question "have you felt it" is not present.*
