# Supplementary material for: Path and site effects deduced from merged transfrontier internet macroseismic data of two recent M 4 earthquakes in northwest Europe using a grid cell approach
Source: Copernicus journal article supplement (doi:10.5194/se-8-453-2017), 2017-04-07
Supplement: Supplementary file 3 [file se-8-453-2017-supplement.zip]

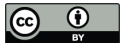

## *Supplement of*

# **Path and site effects deduced from merged transfrontier internet macro-seismic data of two recent *M*<sub>4</sub> earthquakes in northwest Europe using a grid cell approach**

**Koen Van Noten et al.**

*Correspondence to:* Koen Van Noten ([koen.vannoten@gmail.com](mailto:koen.vannoten@gmail.com))

- se-8-453-2017-supplement-title-page.pdf
- 0\_READ\_ME\_VanNotenetal\_Supplement.pdf
- 1\_Questionnaire comparison Van Noten et al.pdf
- Border Faults LRG.dbf
- Border Faults LRG.prj
- Border Faults LRG.qpj
- Border Faults LRG.shp
- Border Faults LRG.shx
- Goch Epicentre.dbf
- Goch Epicentre.prj
- Goch Epicentre.qpj
- Goch Epicentre.shp
- Goch Epicentre.shx
- Goch grid cell intensity map.dbf
- Goch grid cell intensity map.prj
- Goch grid cell intensity map.qpj
- Goch grid cell intensity map.shp
- Goch grid cell intensity map.shx
- Grid cell intensity color scale QGIS.qml

- Ramsgate Epicentre.dbf
- Ramsgate Epicentre.prj
- Ramsgate Epicentre.qpj
- Ramsgate Epicentre.shp
- Ramsgate Epicentre.shx
- Ramsgate grid cell intensity map.dbf
- Ramsgate grid cell intensity map.prj
- Ramsgate grid cell intensity map.qpj
- Ramsgate grid cell intensity map.shp
- Ramsgate grid cell intensity map.shx

The copyright of individual parts of the supplement might differ from the CC-BY 3.0 licence.
