# Supplementary material for: Path and site effects deduced from merged transfrontier internet macroseismic data of two recent M 4 earthquakes in northwest Europe using a grid cell approach
Source: Copernicus journal article supplement (doi:10.5194/se-8-453-2017), 2017-04-07
Supplement: Supplementary file 4 [file se-8-453-2017-supplement.zip]

Archive with 29 entries (29 files):
- se-8-453-2017-supplement-title-page.pdf
- Ramsgate grid cell intensity map.shx
- Border Faults LRG.shx
- Ramsgate Epicentre.prj
- Goch grid cell intensity map.shp
- Goch Epicentre.shp
- Border Faults LRG.prj
- Grid cell intensity color scale QGIS.qml
- Ramsgate grid cell intensity map.shp
- Ramsgate Epicentre.shx
- Border Faults LRG.dbf
- Ramsgate grid cell intensity map.qpj
- Ramsgate Epicentre.shp
- Goch Epicentre.shx
- Ramsgate Epicentre.dbf
- Ramsgate grid cell intensity map.prj
- Goch Epicentre.qpj
- Goch Epicentre.dbf
- Goch grid cell intensity map.qpj
- Border Faults LRG.qpj
- Border Faults LRG.shp
- Goch Epicentre.prj
- Goch grid cell intensity map.shx
- Ramsgate grid cell intensity map.dbf
- Goch grid cell intensity map.prj
- 0_READ_ME_VanNotenetal_Supplement.pdf
- Goch grid cell intensity map.dbf
- 1_Questionnaire comparison Van Noten et al.pdf
- Ramsgate Epicentre.qpj
