# Supplementary material for: Path and site effects deduced from merged transfrontier internet macroseismic data of two recent M 4 earthquakes in northwest Europe using a grid cell approach
Source: Copernicus journal article supplement (doi:10.5194/se-8-453-2017), 2017-04-07
Supplement: Supplementary file 4 [file se-8-453-2017-supplement.zip › Grid cell intensity color scale QGIS.qml]

<!DOCTYPE qgis PUBLIC 'http://mrcc.com/qgis.dtd' 'SYSTEM'>
<qgis version="2.10.1-Pisa" minimumScale="0" maximumScale="1e+08" simplifyDrawingHints="1" minLabelScale="0" maxLabelScale="1e+08" simplifyDrawingTol="1" simplifyMaxScale="1" hasScaleBasedVisibilityFlag="0" simplifyLocal="1" scaleBasedLabelVisibilityFlag="0">
  <edittypes>
    <edittype widgetv2type="TextEdit" name="ID">
      <widgetv2config IsMultiline="0" fieldEditable="1" UseHtml="0" labelOnTop="0"/>
    </edittype>
    <edittype widgetv2type="TextEdit" name="X_MIN">
      <widgetv2config IsMultiline="0" fieldEditable="1" UseHtml="0" labelOnTop="0"/>
    </edittype>
    <edittype widgetv2type="TextEdit" name="X_MAX">
      <widgetv2config IsMultiline="0" fieldEditable="1" UseHtml="0" labelOnTop="0"/>
    </edittype>
    <edittype widgetv2type="TextEdit" name="Y_MIN">
      <widgetv2config IsMultiline="0" fieldEditable="1" UseHtml="0" labelOnTop="0"/>
    </edittype>
    <edittype widgetv2type="TextEdit" name="Y_MAX">
      <widgetv2config IsMultiline="0" fieldEditable="1" UseHtml="0" labelOnTop="0"/>
    </edittype>
    <edittype widgetv2type="TextEdit" name="PNTCNT">
      <widgetv2config IsMultiline="0" fieldEditable="1" UseHtml="0" labelOnTop="0"/>
    </edittype>
    <edittype widgetv2type="TextEdit" name="CII_mean">
      <widgetv2config IsMultiline="0" fieldEditable="1" UseHtml="0" labelOnTop="0"/>
    </edittype>
    <edittype widgetv2type="TextEdit" name="I0 - I">
      <widgetv2config IsMultiline="0" fieldEditable="1" UseHtml="0" labelOnTop="0"/>
    </edittype>
  </edittypes>
  <renderer-v2 symbollevels="0" type="RuleRenderer">
    <rules key="{4eed82af-ecb9-491a-a2af-eef3589e8466}">
      <rule filter="CII_mean = 1" key="{2a9330d5-5d26-4b60-9147-cc4508fe2e85}" symbol="0" label="I, not Felt"/>
      <rule filter="CII_mean > 1" key="{f392447f-228d-411c-957f-59d78c62ef81}" symbol="1" label="Felt, no Intensity"/>
      <rule filter="CII_mean > 1.500000 AND CII_mean &lt;= 2.500000  AND PNTCNT  > 2" key="{367c497a-9550-4b18-8ea2-d5809e5f0aac}" symbol="2" label="II"/>
      <rule filter="CII_mean > 2.5000000 AND CII_mean &lt;= 3.500000  AND PNTCNT  > 2" key="{eb7171e4-f56c-4f22-b7ec-4f689f52d448}" symbol="3" label="III"/>
      <rule filter="CII_mean > 3.500000 AND CII_mean &lt;= 4.500000  AND PNTCNT  > 2" key="{a8ea85c0-3786-4e52-9c4e-748f87f65255}" symbol="4" label="IV"/>
      <rule filter="CII_mean > 4.500000 AND CII_mean &lt;= 5.500000 AND PNTCNT  > 2" key="{775f4cec-5e21-42c5-9505-b52bed61281b}" symbol="5" label="V"/>
      <rule filter="CII_mean > 5.500000 AND CII_mean &lt;=6.5000000  AND PNTCNT  > 2" key="{ce7e443c-e4a7-482d-b463-68f445de417f}" symbol="6" label="VI"/>
    </rules>
    <symbols>
      <symbol alpha="1" clip_to_extent="1" type="fill" name="0">
        <layer pass="0" class="SimpleFill" locked="0">
          <prop k="border_width_map_unit_scale" v="0,0"/>
          <prop k="color" v="210,210,210,255"/>
          <prop k="joinstyle" v="bevel"/>
          <prop k="offset" v="0,0"/>
          <prop k="offset_map_unit_scale" v="0,0"/>
          <prop k="offset_unit" v="MM"/>
          <prop k="outline_color" v="0,0,0,255"/>
          <prop k="outline_style" v="solid"/>
          <prop k="outline_width" v="0.26"/>
          <prop k="outline_width_unit" v="MM"/>
          <prop k="style" v="solid"/>
          <effect enabled="0" type="effectStack">
            <effect type="dropShadow">
              <prop k="blend_mode" v="13"/>
              <prop k="blur_level" v="10"/>
              <prop k="color" v="0,0,0,255"/>
              <prop k="draw_mode" v="2"/>
              <prop k="enabled" v="0"/>
              <prop k="offset_angle" v="135"/>
              <prop k="offset_distance" v="2"/>
              <prop k="offset_unit" v="MM"/>
              <prop k="offset_unit_scale" v="0,0"/>
              <prop k="transparency" v="0"/>
            </effect>
            <effect type="outerGlow">
              <prop k="blend_mode" v="0"/>
              <prop k="blur_level" v="3"/>
              <prop k="color1" v="0,0,255,255"/>
              <prop k="color2" v="0,255,0,255"/>
              <prop k="color_type" v="0"/>
              <prop k="discrete" v="0"/>
              <prop k="draw_mode" v="2"/>
              <prop k="enabled" v="0"/>
              <prop k="single_color" v="255,255,255,255"/>
              <prop k="spread" v="2"/>
              <prop k="spread_unit" v="MM"/>
              <prop k="spread_unit_scale" v="0,0"/>
              <prop k="transparency" v="0.5"/>
            </effect>
            <effect type="drawSource">
              <prop k="blend_mode" v="0"/>
              <prop k="draw_mode" v="2"/>
              <prop k="enabled" v="1"/>
              <prop k="transparency" v="0"/>
            </effect>
            <effect type="innerShadow">
              <prop k="blend_mode" v="13"/>
              <prop k="blur_level" v="10"/>
              <prop k="color" v="0,0,0,255"/>
              <prop k="draw_mode" v="2"/>
              <prop k="enabled" v="0"/>
              <prop k="offset_angle" v="135"/>
              <prop k="offset_distance" v="2"/>
              <prop k="offset_unit" v="MM"/>
              <prop k="offset_unit_scale" v="0,0"/>
              <prop k="transparency" v="0"/>
            </effect>
            <effect type="innerGlow">
              <prop k="blend_mode" v="0"/>
              <prop k="blur_level" v="3"/>
              <prop k="color1" v="0,0,255,255"/>
              <prop k="color2" v="0,255,0,255"/>
              <prop k="color_type" v="0"/>
              <prop k="discrete" v="0"/>
              <prop k="draw_mode" v="2"/>
              <prop k="enabled" v="0"/>
              <prop k="single_color" v="255,255,255,255"/>
              <prop k="spread" v="2"/>
              <prop k="spread_unit" v="MM"/>
              <prop k="spread_unit_scale" v="0,0"/>
              <prop k="transparency" v="0.5"/>
            </effect>
          </effect>
        </layer>
      </symbol>
      <symbol alpha="1" clip_to_extent="1" type="fill" name="1">
        <layer pass="0" class="SimpleFill" locked="0">
          <prop k="border_width_map_unit_scale" v="0,0"/>
          <prop k="color" v="255,255,255,255"/>
          <prop k="joinstyle" v="bevel"/>
          <prop k="offset" v="0,0"/>
          <prop k="offset_map_unit_scale" v="0,0"/>
          <prop k="offset_unit" v="MM"/>
          <prop k="outline_color" v="0,0,0,255"/>
          <prop k="outline_style" v="solid"/>
          <prop k="outline_width" v="0.26"/>
          <prop k="outline_width_unit" v="MM"/>
          <prop k="style" v="solid"/>
          <effect enabled="0" type="effectStack">
            <effect type="dropShadow">
              <prop k="blend_mode" v="13"/>
              <prop k="blur_level" v="10"/>
              <prop k="color" v="0,0,0,255"/>
              <prop k="draw_mode" v="2"/>
              <prop k="enabled" v="0"/>
              <prop k="offset_angle" v="135"/>
              <prop k="offset_distance" v="2"/>
              <prop k="offset_unit" v="MM"/>
              <prop k="offset_unit_scale" v="0,0"/>
              <prop k="transparency" v="0"/>
            </effect>
            <effect type="outerGlow">
              <prop k="blend_mode" v="0"/>
              <prop k="blur_level" v="3"/>
              <prop k="color1" v="0,0,255,255"/>
              <prop k="color2" v="0,255,0,255"/>
              <prop k="color_type" v="0"/>
              <prop k="discrete" v="0"/>
              <prop k="draw_mode" v="2"/>
              <prop k="enabled" v="0"/>
              <prop k="single_color" v="255,255,255,255"/>
              <prop k="spread" v="2"/>
              <prop k="spread_unit" v="MM"/>
              <prop k="spread_unit_scale" v="0,0"/>
              <prop k="transparency" v="0.5"/>
            </effect>
            <effect type="drawSource">
              <prop k="blend_mode" v="0"/>
              <prop k="draw_mode" v="2"/>
              <prop k="enabled" v="1"/>
              <prop k="transparency" v="0"/>
            </effect>
            <effect type="innerShadow">
              <prop k="blend_mode" v="13"/>
              <prop k="blur_level" v="10"/>
              <prop k="color" v="0,0,0,255"/>
              <prop k="draw_mode" v="2"/>
              <prop k="enabled" v="0"/>
              <prop k="offset_angle" v="135"/>
              <prop k="offset_distance" v="2"/>
              <prop k="offset_unit" v="MM"/>
              <prop k="offset_unit_scale" v="0,0"/>
              <prop k="transparency" v="0"/>
            </effect>
            <effect type="innerGlow">
              <prop k="blend_mode" v="0"/>
              <prop k="blur_level" v="3"/>
              <prop k="color1" v="0,0,255,255"/>
              <prop k="color2" v="0,255,0,255"/>
              <prop k="color_type" v="0"/>
              <prop k="discrete" v="0"/>
              <prop k="draw_mode" v="2"/>
              <prop k="enabled" v="0"/>
              <prop k="single_color" v="255,255,255,255"/>
              <prop k="spread" v="2"/>
              <prop k="spread_unit" v="MM"/>
              <prop k="spread_unit_scale" v="0,0"/>
              <prop k="transparency" v="0.5"/>
            </effect>
          </effect>
        </layer>
      </symbol>
      <symbol alpha="0.85" clip_to_extent="1" type="fill" name="2">
        <layer pass="0" class="SimpleFill" locked="0">
          <prop k="border_width_map_unit_scale" v="0,0"/>
          <prop k="color" v="40,247,255,255"/>
          <prop k="joinstyle" v="bevel"/>
          <prop k="offset" v="0,0"/>
          <prop k="offset_map_unit_scale" v="0,0"/>
          <prop k="offset_unit" v="MM"/>
          <prop k="outline_color" v="0,0,0,255"/>
          <prop k="outline_style" v="solid"/>
          <prop k="outline_width" v="0.26"/>
          <prop k="outline_width_unit" v="MM"/>
          <prop k="style" v="solid"/>
          <effect enabled="0" type="effectStack">
            <effect type="dropShadow">
              <prop k="blend_mode" v="13"/>
              <prop k="blur_level" v="10"/>
              <prop k="color" v="0,0,0,255"/>
              <prop k="draw_mode" v="2"/>
              <prop k="enabled" v="0"/>
              <prop k="offset_angle" v="135"/>
              <prop k="offset_distance" v="2"/>
              <prop k="offset_unit" v="MM"/>
              <prop k="offset_unit_scale" v="0,0"/>
              <prop k="transparency" v="0"/>
            </effect>
            <effect type="outerGlow">
              <prop k="blend_mode" v="0"/>
              <prop k="blur_level" v="3"/>
              <prop k="color1" v="0,0,255,255"/>
              <prop k="color2" v="0,255,0,255"/>
              <prop k="color_type" v="0"/>
              <prop k="discrete" v="0"/>
              <prop k="draw_mode" v="2"/>
              <prop k="enabled" v="0"/>
              <prop k="single_color" v="255,255,255,255"/>
              <prop k="spread" v="2"/>
              <prop k="spread_unit" v="MM"/>
              <prop k="spread_unit_scale" v="0,0"/>
              <prop k="transparency" v="0.5"/>
            </effect>
            <effect type="drawSource">
              <prop k="blend_mode" v="0"/>
              <prop k="draw_mode" v="2"/>
              <prop k="enabled" v="1"/>
              <prop k="transparency" v="0"/>
            </effect>
            <effect type="innerShadow">
              <prop k="blend_mode" v="13"/>
              <prop k="blur_level" v="10"/>
              <prop k="color" v="0,0,0,255"/>
              <prop k="draw_mode" v="2"/>
              <prop k="enabled" v="0"/>
              <prop k="offset_angle" v="135"/>
              <prop k="offset_distance" v="2"/>
              <prop k="offset_unit" v="MM"/>
              <prop k="offset_unit_scale" v="0,0"/>
              <prop k="transparency" v="0"/>
            </effect>
            <effect type="innerGlow">
              <prop k="blend_mode" v="0"/>
              <prop k="blur_level" v="3"/>
              <prop k="color1" v="0,0,255,255"/>
              <prop k="color2" v="0,255,0,255"/>
              <prop k="color_type" v="0"/>
              <prop k="discrete" v="0"/>
              <prop k="draw_mode" v="2"/>
              <prop k="enabled" v="0"/>
              <prop k="single_color" v="255,255,255,255"/>
              <prop k="spread" v="2"/>
              <prop k="spread_unit" v="MM"/>
              <prop k="spread_unit_scale" v="0,0"/>
              <prop k="transparency" v="0.5"/>
            </effect>
          </effect>
        </layer>
      </symbol>
      <symbol alpha="0.85" clip_to_extent="1" type="fill" name="3">
        <layer pass="0" class="SimpleFill" locked="0">
          <prop k="border_width_map_unit_scale" v="0,0"/>
          <prop k="color" v="6,251,23,255"/>
          <prop k="joinstyle" v="bevel"/>
          <prop k="offset" v="0,0"/>
          <prop k="offset_map_unit_scale" v="0,0"/>
          <prop k="offset_unit" v="MM"/>
          <prop k="outline_color" v="0,0,0,255"/>
          <prop k="outline_style" v="solid"/>
          <prop k="outline_width" v="0.26"/>
          <prop k="outline_width_unit" v="MM"/>
          <prop k="style" v="solid"/>
          <effect enabled="0" type="effectStack">
            <effect type="dropShadow">
              <prop k="blend_mode" v="13"/>
              <prop k="blur_level" v="10"/>
              <prop k="color" v="0,0,0,255"/>
              <prop k="draw_mode" v="2"/>
              <prop k="enabled" v="0"/>
              <prop k="offset_angle" v="135"/>
              <prop k="offset_distance" v="2"/>
              <prop k="offset_unit" v="MM"/>
              <prop k="offset_unit_scale" v="0,0"/>
              <prop k="transparency" v="0"/>
            </effect>
            <effect type="outerGlow">
              <prop k="blend_mode" v="0"/>
              <prop k="blur_level" v="3"/>
              <prop k="color1" v="0,0,255,255"/>
              <prop k="color2" v="0,255,0,255"/>
              <prop k="color_type" v="0"/>
              <prop k="discrete" v="0"/>
              <prop k="draw_mode" v="2"/>
              <prop k="enabled" v="0"/>
              <prop k="single_color" v="255,255,255,255"/>
              <prop k="spread" v="2"/>
              <prop k="spread_unit" v="MM"/>
              <prop k="spread_unit_scale" v="0,0"/>
              <prop k="transparency" v="0.5"/>
            </effect>
            <effect type="drawSource">
              <prop k="blend_mode" v="0"/>
              <prop k="draw_mode" v="2"/>
              <prop k="enabled" v="1"/>
              <prop k="transparency" v="0"/>
            </effect>
            <effect type="innerShadow">
              <prop k="blend_mode" v="13"/>
              <prop k="blur_level" v="10"/>
              <prop k="color" v="0,0,0,255"/>
              <prop k="draw_mode" v="2"/>
              <prop k="enabled" v="0"/>
              <prop k="offset_angle" v="135"/>
              <prop k="offset_distance" v="2"/>
              <prop k="offset_unit" v="MM"/>
              <prop k="offset_unit_scale" v="0,0"/>
              <prop k="transparency" v="0"/>
            </effect>
            <effect type="innerGlow">
              <prop k="blend_mode" v="0"/>
              <prop k="blur_level" v="3"/>
              <prop k="color1" v="0,0,255,255"/>
              <prop k="color2" v="0,255,0,255"/>
              <prop k="color_type" v="0"/>
              <prop k="discrete" v="0"/>
              <prop k="draw_mode" v="2"/>
              <prop k="enabled" v="0"/>
              <prop k="single_color" v="255,255,255,255"/>
              <prop k="spread" v="2"/>
              <prop k="spread_unit" v="MM"/>
              <prop k="spread_unit_scale" v="0,0"/>
              <prop k="transparency" v="0.5"/>
            </effect>
          </effect>
        </layer>
      </symbol>
      <symbol alpha="0.85" clip_to_extent="1" type="fill" name="4">
        <layer pass="0" class="SimpleFill" locked="0">
          <prop k="border_width_map_unit_scale" v="0,0"/>
          <prop k="color" v="248,224,0,255"/>
          <prop k="joinstyle" v="bevel"/>
          <prop k="offset" v="0,0"/>
          <prop k="offset_map_unit_scale" v="0,0"/>
          <prop k="offset_unit" v="MM"/>
          <prop k="outline_color" v="0,0,0,255"/>
          <prop k="outline_style" v="solid"/>
          <prop k="outline_width" v="0.26"/>
          <prop k="outline_width_unit" v="MM"/>
          <prop k="style" v="solid"/>
          <effect enabled="0" type="effectStack">
            <effect type="dropShadow">
              <prop k="blend_mode" v="13"/>
              <prop k="blur_level" v="10"/>
              <prop k="color" v="0,0,0,255"/>
              <prop k="draw_mode" v="2"/>
              <prop k="enabled" v="0"/>
              <prop k="offset_angle" v="135"/>
              <prop k="offset_distance" v="2"/>
              <prop k="offset_unit" v="MM"/>
              <prop k="offset_unit_scale" v="0,0"/>
              <prop k="transparency" v="0"/>
            </effect>
            <effect type="outerGlow">
              <prop k="blend_mode" v="0"/>
              <prop k="blur_level" v="3"/>
              <prop k="color1" v="0,0,255,255"/>
              <prop k="color2" v="0,255,0,255"/>
              <prop k="color_type" v="0"/>
              <prop k="discrete" v="0"/>
              <prop k="draw_mode" v="2"/>
              <prop k="enabled" v="0"/>
              <prop k="single_color" v="255,255,255,255"/>
              <prop k="spread" v="2"/>
              <prop k="spread_unit" v="MM"/>
              <prop k="spread_unit_scale" v="0,0"/>
              <prop k="transparency" v="0.5"/>
            </effect>
            <effect type="drawSource">
              <prop k="blend_mode" v="0"/>
              <prop k="draw_mode" v="2"/>
              <prop k="enabled" v="1"/>
              <prop k="transparency" v="0"/>
            </effect>
            <effect type="innerShadow">
              <prop k="blend_mode" v="13"/>
              <prop k="blur_level" v="10"/>
              <prop k="color" v="0,0,0,255"/>
              <prop k="draw_mode" v="2"/>
              <prop k="enabled" v="0"/>
              <prop k="offset_angle" v="135"/>
              <prop k="offset_distance" v="2"/>
              <prop k="offset_unit" v="MM"/>
              <prop k="offset_unit_scale" v="0,0"/>
              <prop k="transparency" v="0"/>
            </effect>
            <effect type="innerGlow">
              <prop k="blend_mode" v="0"/>
              <prop k="blur_level" v="3"/>
              <prop k="color1" v="0,0,255,255"/>
              <prop k="color2" v="0,255,0,255"/>
              <prop k="color_type" v="0"/>
              <prop k="discrete" v="0"/>
              <prop k="draw_mode" v="2"/>
              <prop k="enabled" v="0"/>
              <prop k="single_color" v="255,255,255,255"/>
              <prop k="spread" v="2"/>
              <prop k="spread_unit" v="MM"/>
              <prop k="spread_unit_scale" v="0,0"/>
              <prop k="transparency" v="0.5"/>
            </effect>
          </effect>
        </layer>
      </symbol>
      <symbol alpha="0.85" clip_to_extent="1" type="fill" name="5">
        <layer pass="0" class="SimpleFill" locked="0">
          <prop k="border_width_map_unit_scale" v="0,0"/>
          <prop k="color" v="255,128,0,255"/>
          <prop k="joinstyle" v="bevel"/>
          <prop k="offset" v="0,0"/>
          <prop k="offset_map_unit_scale" v="0,0"/>
          <prop k="offset_unit" v="MM"/>
          <prop k="outline_color" v="0,0,0,255"/>
          <prop k="outline_style" v="solid"/>
          <prop k="outline_width" v="0.26"/>
          <prop k="outline_width_unit" v="MM"/>
          <prop k="style" v="solid"/>
          <effect enabled="0" type="effectStack">
            <effect type="dropShadow">
              <prop k="blend_mode" v="13"/>
              <prop k="blur_level" v="10"/>
              <prop k="color" v="0,0,0,255"/>
              <prop k="draw_mode" v="2"/>
              <prop k="enabled" v="0"/>
              <prop k="offset_angle" v="135"/>
              <prop k="offset_distance" v="2"/>
              <prop k="offset_unit" v="MM"/>
              <prop k="offset_unit_scale" v="0,0"/>
              <prop k="transparency" v="0"/>
            </effect>
            <effect type="outerGlow">
              <prop k="blend_mode" v="0"/>
              <prop k="blur_level" v="3"/>
              <prop k="color1" v="0,0,255,255"/>
              <prop k="color2" v="0,255,0,255"/>
              <prop k="color_type" v="0"/>
              <prop k="discrete" v="0"/>
              <prop k="draw_mode" v="2"/>
              <prop k="enabled" v="0"/>
              <prop k="single_color" v="255,255,255,255"/>
              <prop k="spread" v="2"/>
              <prop k="spread_unit" v="MM"/>
              <prop k="spread_unit_scale" v="0,0"/>
              <prop k="transparency" v="0.5"/>
            </effect>
            <effect type="drawSource">
              <prop k="blend_mode" v="0"/>
              <prop k="draw_mode" v="2"/>
              <prop k="enabled" v="1"/>
              <prop k="transparency" v="0"/>
            </effect>
            <effect type="innerShadow">
              <prop k="blend_mode" v="13"/>
              <prop k="blur_level" v="10"/>
              <prop k="color" v="0,0,0,255"/>
              <prop k="draw_mode" v="2"/>
              <prop k="enabled" v="0"/>
              <prop k="offset_angle" v="135"/>
              <prop k="offset_distance" v="2"/>
              <prop k="offset_unit" v="MM"/>
              <prop k="offset_unit_scale" v="0,0"/>
              <prop k="transparency" v="0"/>
            </effect>
            <effect type="innerGlow">
              <prop k="blend_mode" v="0"/>
              <prop k="blur_level" v="3"/>
              <prop k="color1" v="0,0,255,255"/>
              <prop k="color2" v="0,255,0,255"/>
              <prop k="color_type" v="0"/>
              <prop k="discrete" v="0"/>
              <prop k="draw_mode" v="2"/>
              <prop k="enabled" v="0"/>
              <prop k="single_color" v="255,255,255,255"/>
              <prop k="spread" v="2"/>
              <prop k="spread_unit" v="MM"/>
              <prop k="spread_unit_scale" v="0,0"/>
              <prop k="transparency" v="0.5"/>
            </effect>
          </effect>
        </layer>
      </symbol>
      <symbol alpha="0.85" clip_to_extent="1" type="fill" name="6">
        <layer pass="0" class="SimpleFill" locked="0">
          <prop k="border_width_map_unit_scale" v="0,0"/>
          <prop k="color" v="249,3,16,255"/>
          <prop k="joinstyle" v="bevel"/>
          <prop k="offset" v="0,0"/>
          <prop k="offset_map_unit_scale" v="0,0"/>
          <prop k="offset_unit" v="MM"/>
          <prop k="outline_color" v="0,0,0,255"/>
          <prop k="outline_style" v="solid"/>
          <prop k="outline_width" v="0.26"/>
          <prop k="outline_width_unit" v="MM"/>
          <prop k="style" v="solid"/>
          <effect enabled="0" type="effectStack">
            <effect type="dropShadow">
              <prop k="blend_mode" v="13"/>
              <prop k="blur_level" v="10"/>
              <prop k="color" v="0,0,0,255"/>
              <prop k="draw_mode" v="2"/>
              <prop k="enabled" v="0"/>
              <prop k="offset_angle" v="135"/>
              <prop k="offset_distance" v="2"/>
              <prop k="offset_unit" v="MM"/>
              <prop k="offset_unit_scale" v="0,0"/>
              <prop k="transparency" v="0"/>
            </effect>
            <effect type="outerGlow">
              <prop k="blend_mode" v="0"/>
              <prop k="blur_level" v="3"/>
              <prop k="color1" v="0,0,255,255"/>
              <prop k="color2" v="0,255,0,255"/>
              <prop k="color_type" v="0"/>
              <prop k="discrete" v="0"/>
              <prop k="draw_mode" v="2"/>
              <prop k="enabled" v="0"/>
              <prop k="single_color" v="255,255,255,255"/>
              <prop k="spread" v="2"/>
              <prop k="spread_unit" v="MM"/>
              <prop k="spread_unit_scale" v="0,0"/>
              <prop k="transparency" v="0.5"/>
            </effect>
            <effect type="drawSource">
              <prop k="blend_mode" v="0"/>
              <prop k="draw_mode" v="2"/>
              <prop k="enabled" v="1"/>
              <prop k="transparency" v="0"/>
            </effect>
            <effect type="innerShadow">
              <prop k="blend_mode" v="13"/>
              <prop k="blur_level" v="10"/>
              <prop k="color" v="0,0,0,255"/>
              <prop k="draw_mode" v="2"/>
              <prop k="enabled" v="0"/>
              <prop k="offset_angle" v="135"/>
              <prop k="offset_distance" v="2"/>
              <prop k="offset_unit" v="MM"/>
              <prop k="offset_unit_scale" v="0,0"/>
              <prop k="transparency" v="0"/>
            </effect>
            <effect type="innerGlow">
              <prop k="blend_mode" v="0"/>
              <prop k="blur_level" v="3"/>
              <prop k="color1" v="0,0,255,255"/>
              <prop k="color2" v="0,255,0,255"/>
              <prop k="color_type" v="0"/>
              <prop k="discrete" v="0"/>
              <prop k="draw_mode" v="2"/>
              <prop k="enabled" v="0"/>
              <prop k="single_color" v="255,255,255,255"/>
              <prop k="spread" v="2"/>
              <prop k="spread_unit" v="MM"/>
              <prop k="spread_unit_scale" v="0,0"/>
              <prop k="transparency" v="0.5"/>
            </effect>
          </effect>
        </layer>
      </symbol>
    </symbols>
    <effect enabled="0" type="effectStack">
      <effect type="dropShadow">
        <prop k="blend_mode" v="13"/>
        <prop k="blur_level" v="10"/>
        <prop k="color" v="0,0,0,255"/>
        <prop k="draw_mode" v="2"/>
        <prop k="enabled" v="0"/>
        <prop k="offset_angle" v="135"/>
        <prop k="offset_distance" v="2"/>
        <prop k="offset_unit" v="MM"/>
        <prop k="offset_unit_scale" v="0,0"/>
        <prop k="transparency" v="0"/>
      </effect>
      <effect type="outerGlow">
        <prop k="blend_mode" v="0"/>
        <prop k="blur_level" v="3"/>
        <prop k="color1" v="0,0,255,255"/>
        <prop k="color2" v="0,255,0,255"/>
        <prop k="color_type" v="0"/>
        <prop k="discrete" v="0"/>
        <prop k="draw_mode" v="2"/>
        <prop k="enabled" v="0"/>
        <prop k="single_color" v="255,255,255,255"/>
        <prop k="spread" v="2"/>
        <prop k="spread_unit" v="MM"/>
        <prop k="spread_unit_scale" v="0,0"/>
        <prop k="transparency" v="0.5"/>
      </effect>
      <effect type="drawSource">
        <prop k="blend_mode" v="0"/>
        <prop k="draw_mode" v="2"/>
        <prop k="enabled" v="1"/>
        <prop k="transparency" v="0"/>
      </effect>
      <effect type="innerShadow">
        <prop k="blend_mode" v="13"/>
        <prop k="blur_level" v="10"/>
        <prop k="color" v="0,0,0,255"/>
        <prop k="draw_mode" v="2"/>
        <prop k="enabled" v="0"/>
        <prop k="offset_angle" v="135"/>
        <prop k="offset_distance" v="2"/>
        <prop k="offset_unit" v="MM"/>
        <prop k="offset_unit_scale" v="0,0"/>
        <prop k="transparency" v="0"/>
      </effect>
      <effect type="innerGlow">
        <prop k="blend_mode" v="0"/>
        <prop k="blur_level" v="3"/>
        <prop k="color1" v="0,0,255,255"/>
        <prop k="color2" v="0,255,0,255"/>
        <prop k="color_type" v="0"/>
        <prop k="discrete" v="0"/>
        <prop k="draw_mode" v="2"/>
        <prop k="enabled" v="0"/>
        <prop k="single_color" v="255,255,255,255"/>
        <prop k="spread" v="2"/>
        <prop k="spread_unit" v="MM"/>
        <prop k="spread_unit_scale" v="0,0"/>
        <prop k="transparency" v="0.5"/>
      </effect>
    </effect>
  </renderer-v2>
  <customproperties>
    <property key="labeling" value="pal"/>
    <property key="labeling/addDirectionSymbol" value="false"/>
    <property key="labeling/angleOffset" value="0"/>
    <property key="labeling/blendMode" value="0"/>
    <property key="labeling/bufferBlendMode" value="0"/>
    <property key="labeling/bufferColorA" value="255"/>
    <property key="labeling/bufferColorB" value="255"/>
    <property key="labeling/bufferColorG" value="255"/>
    <property key="labeling/bufferColorR" value="255"/>
    <property key="labeling/bufferDraw" value="false"/>
    <property key="labeling/bufferJoinStyle" value="64"/>
    <property key="labeling/bufferNoFill" value="false"/>
    <property key="labeling/bufferSize" value="1"/>
    <property key="labeling/bufferSizeInMapUnits" value="false"/>
    <property key="labeling/bufferSizeMapUnitMaxScale" value="0"/>
    <property key="labeling/bufferSizeMapUnitMinScale" value="0"/>
    <property key="labeling/bufferTransp" value="0"/>
    <property key="labeling/centroidInside" value="false"/>
    <property key="labeling/centroidWhole" value="false"/>
    <property key="labeling/decimals" value="3"/>
    <property key="labeling/displayAll" value="false"/>
    <property key="labeling/dist" value="0"/>
    <property key="labeling/distInMapUnits" value="false"/>
    <property key="labeling/distMapUnitMaxScale" value="0"/>
    <property key="labeling/distMapUnitMinScale" value="0"/>
    <property key="labeling/enabled" value="false"/>
    <property key="labeling/fieldName" value=""/>
    <property key="labeling/fontBold" value="false"/>
    <property key="labeling/fontCapitals" value="0"/>
    <property key="labeling/fontFamily" value="MS Shell Dlg 2"/>
    <property key="labeling/fontItalic" value="false"/>
    <property key="labeling/fontLetterSpacing" value="0"/>
    <property key="labeling/fontLimitPixelSize" value="false"/>
    <property key="labeling/fontMaxPixelSize" value="10000"/>
    <property key="labeling/fontMinPixelSize" value="3"/>
    <property key="labeling/fontSize" value="8.25"/>
    <property key="labeling/fontSizeInMapUnits" value="false"/>
    <property key="labeling/fontSizeMapUnitMaxScale" value="0"/>
    <property key="labeling/fontSizeMapUnitMinScale" value="0"/>
    <property key="labeling/fontStrikeout" value="false"/>
    <property key="labeling/fontUnderline" value="false"/>
    <property key="labeling/fontWeight" value="50"/>
    <property key="labeling/fontWordSpacing" value="0"/>
    <property key="labeling/formatNumbers" value="false"/>
    <property key="labeling/isExpression" value="true"/>
    <property key="labeling/labelOffsetInMapUnits" value="true"/>
    <property key="labeling/labelOffsetMapUnitMaxScale" value="0"/>
    <property key="labeling/labelOffsetMapUnitMinScale" value="0"/>
    <property key="labeling/labelPerPart" value="false"/>
    <property key="labeling/leftDirectionSymbol" value="&lt;"/>
    <property key="labeling/limitNumLabels" value="false"/>
    <property key="labeling/maxCurvedCharAngleIn" value="20"/>
    <property key="labeling/maxCurvedCharAngleOut" value="-20"/>
    <property key="labeling/maxNumLabels" value="2000"/>
    <property key="labeling/mergeLines" value="false"/>
    <property key="labeling/minFeatureSize" value="0"/>
    <property key="labeling/multilineAlign" value="0"/>
    <property key="labeling/multilineHeight" value="1"/>
    <property key="labeling/namedStyle" value="Normal"/>
    <property key="labeling/obstacle" value="true"/>
    <property key="labeling/placeDirectionSymbol" value="0"/>
    <property key="labeling/placement" value="1"/>
    <property key="labeling/placementFlags" value="0"/>
    <property key="labeling/plussign" value="false"/>
    <property key="labeling/preserveRotation" value="true"/>
    <property key="labeling/previewBkgrdColor" value="#ffffff"/>
    <property key="labeling/priority" value="5"/>
    <property key="labeling/quadOffset" value="4"/>
    <property key="labeling/repeatDistance" value="0"/>
    <property key="labeling/repeatDistanceMapUnitMaxScale" value="0"/>
    <property key="labeling/repeatDistanceMapUnitMinScale" value="0"/>
    <property key="labeling/repeatDistanceUnit" value="1"/>
    <property key="labeling/reverseDirectionSymbol" value="false"/>
    <property key="labeling/rightDirectionSymbol" value=">"/>
    <property key="labeling/scaleMax" value="10000000"/>
    <property key="labeling/scaleMin" value="1"/>
    <property key="labeling/scaleVisibility" value="false"/>
    <property key="labeling/shadowBlendMode" value="6"/>
    <property key="labeling/shadowColorB" value="0"/>
    <property key="labeling/shadowColorG" value="0"/>
    <property key="labeling/shadowColorR" value="0"/>
    <property key="labeling/shadowDraw" value="false"/>
    <property key="labeling/shadowOffsetAngle" value="135"/>
    <property key="labeling/shadowOffsetDist" value="1"/>
    <property key="labeling/shadowOffsetGlobal" value="true"/>
    <property key="labeling/shadowOffsetMapUnitMaxScale" value="0"/>
    <property key="labeling/shadowOffsetMapUnitMinScale" value="0"/>
    <property key="labeling/shadowOffsetUnits" value="1"/>
    <property key="labeling/shadowRadius" value="1.5"/>
    <property key="labeling/shadowRadiusAlphaOnly" value="false"/>
    <property key="labeling/shadowRadiusMapUnitMaxScale" value="0"/>
    <property key="labeling/shadowRadiusMapUnitMinScale" value="0"/>
    <property key="labeling/shadowRadiusUnits" value="1"/>
    <property key="labeling/shadowScale" value="100"/>
    <property key="labeling/shadowTransparency" value="30"/>
    <property key="labeling/shadowUnder" value="0"/>
    <property key="labeling/shapeBlendMode" value="0"/>
    <property key="labeling/shapeBorderColorA" value="255"/>
    <property key="labeling/shapeBorderColorB" value="128"/>
    <property key="labeling/shapeBorderColorG" value="128"/>
    <property key="labeling/shapeBorderColorR" value="128"/>
    <property key="labeling/shapeBorderWidth" value="0"/>
    <property key="labeling/shapeBorderWidthMapUnitMaxScale" value="0"/>
    <property key="labeling/shapeBorderWidthMapUnitMinScale" value="0"/>
    <property key="labeling/shapeBorderWidthUnits" value="1"/>
    <property key="labeling/shapeDraw" value="false"/>
    <property key="labeling/shapeFillColorA" value="255"/>
    <property key="labeling/shapeFillColorB" value="255"/>
    <property key="labeling/shapeFillColorG" value="255"/>
    <property key="labeling/shapeFillColorR" value="255"/>
    <property key="labeling/shapeJoinStyle" value="64"/>
    <property key="labeling/shapeOffsetMapUnitMaxScale" value="0"/>
    <property key="labeling/shapeOffsetMapUnitMinScale" value="0"/>
    <property key="labeling/shapeOffsetUnits" value="1"/>
    <property key="labeling/shapeOffsetX" value="0"/>
    <property key="labeling/shapeOffsetY" value="0"/>
    <property key="labeling/shapeRadiiMapUnitMaxScale" value="0"/>
    <property key="labeling/shapeRadiiMapUnitMinScale" value="0"/>
    <property key="labeling/shapeRadiiUnits" value="1"/>
    <property key="labeling/shapeRadiiX" value="0"/>
    <property key="labeling/shapeRadiiY" value="0"/>
    <property key="labeling/shapeRotation" value="0"/>
    <property key="labeling/shapeRotationType" value="0"/>
    <property key="labeling/shapeSVGFile" value=""/>
    <property key="labeling/shapeSizeMapUnitMaxScale" value="0"/>
    <property key="labeling/shapeSizeMapUnitMinScale" value="0"/>
    <property key="labeling/shapeSizeType" value="0"/>
    <property key="labeling/shapeSizeUnits" value="1"/>
    <property key="labeling/shapeSizeX" value="0"/>
    <property key="labeling/shapeSizeY" value="0"/>
    <property key="labeling/shapeTransparency" value="0"/>
    <property key="labeling/shapeType" value="0"/>
    <property key="labeling/textColorA" value="255"/>
    <property key="labeling/textColorB" value="0"/>
    <property key="labeling/textColorG" value="0"/>
    <property key="labeling/textColorR" value="0"/>
    <property key="labeling/textTransp" value="0"/>
    <property key="labeling/upsidedownLabels" value="0"/>
    <property key="labeling/wrapChar" value=""/>
    <property key="labeling/xOffset" value="0"/>
    <property key="labeling/yOffset" value="0"/>
  </customproperties>
  <blendMode>0</blendMode>
  <featureBlendMode>0</featureBlendMode>
  <layerTransparency>0</layerTransparency>
  <displayfield>ID</displayfield>
  <label>0</label>
  <labelattributes>
    <label fieldname="" text="Label"/>
    <family fieldname="" name="MS Shell Dlg 2"/>
    <size fieldname="" units="pt" value="12"/>
    <bold fieldname="" on="0"/>
    <italic fieldname="" on="0"/>
    <underline fieldname="" on="0"/>
    <strikeout fieldname="" on="0"/>
    <color fieldname="" red="0" blue="0" green="0"/>
    <x fieldname=""/>
    <y fieldname=""/>
    <offset x="0" y="0" units="pt" yfieldname="" xfieldname=""/>
    <angle fieldname="" value="0" auto="0"/>
    <alignment fieldname="" value="center"/>
    <buffercolor fieldname="" red="255" blue="255" green="255"/>
    <buffersize fieldname="" units="pt" value="1"/>
    <bufferenabled fieldname="" on=""/>
    <multilineenabled fieldname="" on=""/>
    <selectedonly on=""/>
  </labelattributes>
  <SingleCategoryDiagramRenderer diagramType="Pie">
    <DiagramCategory penColor="#000000" labelPlacementMethod="XHeight" penWidth="0" diagramOrientation="Up" minimumSize="0" barWidth="5" penAlpha="255" maxScaleDenominator="1e+08" backgroundColor="#ffffff" transparency="0" width="15" scaleDependency="Area" backgroundAlpha="255" angleOffset="1440" scaleBasedVisibility="0" enabled="0" height="15" sizeType="MM" minScaleDenominator="0">
      <fontProperties description="MS Shell Dlg 2,8.25,-1,5,50,0,0,0,0,0" style=""/>
      <attribute field="" color="#000000" label=""/>
    </DiagramCategory>
  </SingleCategoryDiagramRenderer>
  <DiagramLayerSettings yPosColumn="-1" linePlacementFlags="10" placement="0" dist="0" xPosColumn="-1" priority="0" obstacle="0" showAll="1"/>
  <editform>.</editform>
  <editforminit/>
  <featformsuppress>0</featformsuppress>
  <annotationform>.</annotationform>
  <editorlayout>generatedlayout</editorlayout>
  <excludeAttributesWMS/>
  <excludeAttributesWFS/>
  <attributeactions/>
</qgis>
