# Supplementary material for: Path and site effects deduced from merged transfrontier internet macroseismic data of two recent M 4 earthquakes in northwest Europe using a grid cell approach
Source: Copernicus journal article supplement (doi:10.5194/se-8-453-2017), 2017-04-07
Supplement: Supplementary file 4 [file se-8-453-2017-supplement.zip › Ramsgate Epicentre.prj]

GEOGCS["GCS_WGS_1984",DATUM["D_WGS_1984",SPHEROID["WGS_1984",6378137,298.257223563]],PRIMEM["Greenwich",0],UNIT["Degree",0.017453292519943295]]
